# Supplementary material
Source: MDPI journal article supplement (https://www.mdpi.com/2073-4441/14/15/2399)
Supplement: s1 [file s1 › Supplementary Material S1.pdf]

## Supplementary Material S1

This Supplementary Material contains the VBA code for IrrigTool.

```
Private Sub IRRIGATION_Click()
Dim i, j, frL, frC1, frC2 As Integer ' indexes and sheet cells counters
' READ INPUT DATA
Dim Pu(1 To 12), tn(1 To 12), K1(1 To 12), Kp(1 To 12), Af(1 To 12) As Single
' Pu - the monthly water contribution from precipitation
' tn - the monthly average temperature
' K1 - coefficient that depends on the zone latitude, function of the hours of light
' Kp - coefficient that depends on the crop type
' Af - the water contribution from groundwater
frL = 2: frC1 = 8
' location of the line and the column for reading data, mean values (Pu, t) from sheet S1
For i = 1 To 12
Pu(i) = Sheets("Pu, t (S1)").Cells(frL + 1, frC1 + i) * 10 ' read Pu
tn(i) = Sheets("Pu, t (S1)").Cells(frL + 2, frC1 + i) ' read tn
If Pu(i) = "" Or tn(i) = "" Then
Cells(1, 1) = "Missing data in the table Pu, t (S1)"
GoTo LAST
Exit For
End If
Next i
frL = 3: frC1 = 2 ' location of the line and the column for writing data (Irrigation S1)
For i = 1 To 12
Cells(frL + 1, frC1 + i) = Pu(i) ' write Pu
Cells(frL + 2, frC1 + i) = tn(i) ' write tn
Next i

For i = 1 To 1000 ' read K1 values
If Sheets("K1").Cells(3 + i, 1) = "" Then
Cells(1, 1) = "Missing data in the table < K1 >"
GoTo LAST
Else
If Cells(4, 17) = Sheets("K1").Cells(3 + i, 1) Then
For j = 1 To 12
If Sheets("K1").Cells(3 + i, j + 3) = "" Then
Cells(1, 1) = "Missing data in the table < K1 >"
GoTo LAST
End If
Cells(frL + 3, frC1 + j) = Sheets("K1").Cells(3 + i, j + 3) ' write K1
K1(j) = Cells(frL + 3, frC1 + j) ' record K1
Next j
Exit For
End If
```

```

End If
Next i

For i = 1 To 1000 ' read Kp
    If Sheets("Kp").Cells(3 + i, 1) = "" Then
        Cells(1, 1) = "Missing data in the table < Kp >"
        GoTo LAST
    Else
        If Cells(5, 17) = Sheets("Kp").Cells(3 + i, 1) Then
            For j = 1 To 12
                If Sheets("Kp").Cells(3 + i, j + 3) = "" Then
                    Cells(1, 1) = "Missing data in the table < Kp >"
                    GoTo LAST
                End If
                Cells(frL + 4, frC1 + j) = Sheets("Kp").Cells(3 + i, j + 3) ' write Kp
                Kp(j) = Cells(frL + 4, frC1 + j) ' record Kp
            Next j
            Exit For
        End If
    End If
Next i

For i = 1 To 1000 ' read Af
    If Sheets("Af").Cells(3 + i, 1) = "" Then
        Cells(1, 1) = "Missing data in the table < Af >"
        GoTo LAST
    Else
        If Cells(6, 17) = Sheets("Af").Cells(3 + i, 1) Then
            For j = 1 To 12
                If Sheets("Af").Cells(3 + i, j + 3) = "" Then
                    Cells(1, 1) = "Missing data in the table < Af >"
                    GoTo LAST
                End If
                Cells(frL + 5, frC1 + j) = Sheets("Af").Cells(3 + i, j + 3) ' write Af
                Af(j) = Cells(frL + 5, frC1 + j) ' record Af
            Next j
            Exit For
        End If
    End If
Next i

Dim ETRM(1 To 12) As Single ' ETRM computation (m³/ha) - formula (3)

```

```

If Cells(9, 17) = "AUTO" Or Cells(9, 17) = "auto" Or Cells(9, 17) = "Auto" Then GoTo
ETRM_CALC
For i = 1 To 1000 ' read ETRM values if ETRM-code = AUTO
    If Sheets("ETRM").Cells(3 + i, 1) = "" Then
        Cells(1, 1) = "Missing data in the table < ETRM >"
        GoTo LAST
    Else
        If Cells(9, 17) = Sheets("ETRM").Cells(3 + i, 1) Then
            For j = 1 To 12
                If Sheets("ETRM").Cells(3 + i, j + 3) = "" Then
                    Cells(1, 1) = "Missing data in the table < ETRM >"
                    GoTo LAST
                End If
                Cells(frL + 6, frC1 + j) = Sheets("ETRM").Cells(3 + i, j + 3) ' write Af
                ETRM(j) = Cells(frL + 6, frC1 + j) ' record ETRM
            Next j
            GoTo ETRM_MAN
        End If
    End If
Next i

```

ETRM\_CALC:

Dim itn(1 To 12), II, a, x As Single

' ETRM CALCULUS

' ETRM - the water consumption by the plant evapotranspiration at the soil surface

' itn - the monthly thermic index

' II - the annual thermic index (I) – formula (4)

' a - coefficient defined by formula (5)

' itn calculus

For i = 1 To 12

    If tn(i) > 0 Then

        itn(i) = (tn(i) / 5) ^ 1.514

    Else

        itn(i) = 0

    End If

Next i

' II calculus

II = 0

For i = 1 To 12

    II = II + itn(i) ' annual thermic index calculus– formula (4)

Next i

' a calculus – formula (5)

a = 6.75 \* 10<sup>^(-7)</sup>\*II<sup>^3</sup> – 7.71\*10<sup>^(-5)</sup>\*II<sup>^2</sup> + 1.792\*10<sup>^(-2)</sup>\*I + 0.49239

' ETRM values calculus – formula (3)

```

For i = 1 To 12
    If tn(i) > 0 Then
        ETRM(i) = 160 * (10 * tn(i) / II) ^ (a) * K1(i) * Kp(i)
        Cells(frL + 6, frC1 + i) = Format(ETRM(i), "0###")
    Else
        ETRM(i) = 0
        Cells(frL + 6, frC1 + i) = "0"
    End If
Next i

```

ETRM\_MAN:

' READ SOIL CHARACTERISTICS

Dim culture, location, texture, season As String

Dim Hw, DAw, C0w, Ccw, Dim hs, DAs, C0s, Ccs, ha as Single

Dim Rmin(1 To 12), Rmax(1 To 12) As Single

' Hw - the soil depth able to stock the water outside the vegetation period, given in tables

' hs - the depth of active layer, in vegetable period, given in table

' DA - he soil bulk density (t/m<sup>3</sup>)

' C0 - the faded capacity in field (%), corresponding to the depth Hw.

' Cc - the water capacity in field (%), corresponding to the depth Hw.

' Rmin - the minimum reserve of the water in the soil.

' Rmax - the maximum reserve of the water in the soil.

' Pemin - minimum admissible humidity.

For i = 1 To 1000 ' read data for soil in Winter (H , DA, C0, Cc)

    If Sheets("Soil").Cells(4 + i, 1) = "" Then

        Cells(1, 1) = "Missing data in the table < Soil >"

        GoTo LAST

    Else

        If Cells(7, 17) = Sheets("Soil").Cells(4 + i, 1) Then

            If Sheets("Soil").Cells(4 + i, 3) <> "Winter" Then

                Cells(1, 1) = "Wrong data in the table < Soil >"

                GoTo LAST

            End If

            location = Sheets("Soil").Cells(4 + i, 2) ' read location

            season = Sheets("Soil").Cells(4 + i, 3) ' read season

            culture = Sheets("Soil").Cells(4 + i, 4) ' read crop

            texture = Sheets("Soil").Cells(4 + i, 5) ' read texture

            Hw = Sheets("Soil").Cells(4 + i, 6) ' read Hw

            DAw = Sheets("Soil").Cells(4 + i, 7) ' read DAw

            C0w = Sheets("Soil").Cells(4 + i, 8) ' read C0w

            Ccw = Sheets("Soil").Cells(4 + i, 9) ' read Ccw

            If location = "" Or season = "" Or culture = "" Or texture = "" Or Hw = "" Or

DAw = "" Or C0w = "" Or Ccw = "" Then

                Cells(1, 1) = "Missing data in the table of soil characteristics table"

```

        GoTo LAST
    End If
    Exit For
End If
End If
Next i

For i = 1 To 1000 ' read data for soil for the vegetation period (h , DA, C0, Cc)
    If Sheets("Soil").Cells(4 + i, 1) = "" Then
        Cells(1, 1) = "Missing data in the table < Soil >"
        GoTo LAST
    Else
        If Cells(8, 17) = Sheets("Soil").Cells(4 + i, 1) Then
            If Sheets("Soil").Cells(4 + i, 3) <> "Summer" Then
                Cells(1, 1) = "Wrong data in the table < Soil >"
                GoTo LAST
            End If
            location = Sheets("Soil").Cells(4 + i, 2) ' read location
            season = Sheets("Soil").Cells(4 + i, 3) ' read season
            culture = Sheets("Soil").Cells(4 + i, 4) ' read crop
            texture = Sheets("Soil").Cells(4 + i, 5) ' read texture
            hs = Sheets("Soil").Cells(4 + i, 6) ' read hs
            DAs = Sheets("Soil").Cells(4 + i, 7) ' read DAs
            C0s = Sheets("Soil").Cells(4 + i, 8) ' read C0s
            Ccs = Sheets("Soil").Cells(4 + i, 9) ' read Ccs
            If location = "" Or season = "" Or culture = "" Or texture = "" Or hs = "" Or DAs = "" Or C0s = "" Or Ccs = "" Then
                Cells(1, 1) = "Missing data in the table of the soil characteristics table"
                GoTo LAST
            End If
        End If
    Exit For
End If
End If
Next i

```

' Rmax and Rmin calculus outside the vegetation period, Hw

```

For i = 1 To 6
    Rmax(i) = 100 * Hw * Ccw * DAw
    Rmin(i) = 100 * Hw * C0w * DAw
    Cells(frL + 7, frC1 + i) = Format(Rmax(i), "0###")
    Cells(frL + 8, frC1 + i) = Format(Rmin(i), "0###")
Next i

```

' Rmax and Rmin calculus for the vegetation period, hs

Dim Pemin As Single

'Pemin computation

If texture = "light" Then

$$Pemin = C0s + 1 / 3 * (Ccs - C0s)$$

ElseIf texture = "medium" Then

$$Pemin = C0s + 1 / 2 * (Ccs - C0s)$$

ElseIf texture = "heavy" Then

$$Pemin = C0s + 2 / 3 * (Ccs - C0s)$$

Else

Cells(1, 1) = "This texture doesn't exist"

GoTo LAST

End If

For i = 7 To 12

$$Rmax(i) = 100 * hs * DAs * Ccs$$

$$Rmin(i) = 100 * hs * DAs * Pemin$$

$$Cells(frL + 7, frC1 + i) = Format(Rmax(i), "0###")$$

$$Cells(frL + 8, frC1 + i) = Format(Rmin(i), "0###")$$

Next i

Dim m, Ri(1 To 12), RF(1 To 12), RFa(1 To 12), NU(12), n(100) As Single

' m - the water application rate – equation (11)

' Ri - the initial water reserve in the soil

' RF - the final water reserve in the soil

' RFa – the total water volume used in a month as a function of the watering number

' NU - the irrigation rate – equation (1)

' n - watering number

$$m = 100 * hs * DAs * (Ccs - Pemin) \text{ ' calculus of m – equation (12)}$$

$$NU(0) = 0$$

Dim RezIni As Single

'RezIni = Cells(14, 14) ' Read the final water reserve from the month IX

RezIni = Cells(10, 17) ' Read the final water reserve from the month IX

Range("C4:N16").Select

Selection.ClearContents

Range("A3:A3").Select

If Cells(10, 17) = "0" Then

$$Ri(1) = 100 * Hw * DAw * Pemin \text{ ' equation (9)}$$

Else

Ri(1) = RezIni ' If the initial water reserve is introduced by the user

End If

$$RF(1) = Pu(1) + Af(1) - ETRM(1) + Ri(1) \text{ ' equation (11)}$$

```

For i = 1 To 12
    If i > 1 Then Ri(i) = RF(i - 1)
    ' the initial water reserve in month i+1 is equal to the final reserve from the month i.
    If i = 7 Then Ri(i) = RF(i - 1) / Hw * hs
    ' reducing Ri by Hw/hs for the first month of the vegetation period (April)
    ' according to [41], p. 46
    If Ri(i) >= Rmax(i) Then Ri(i) = Rmax(i) ' condition for the initial water reserve
    RF(i) = Pu(i) + Af(i) - ETRM(i) + Ri(i)
    ' computation of the final water reserve for a month – equation (11)
    If RF(i) >= Rmax(i) Then RF(i) = Rmax(i) ' condition for the final water reserve
    n(i) = 0

    Do While RF(i) + RFa(i) <= Rmin(i)
    ' watering until the minimum water reserve is exceeded
        n(i) = n(i) + 1
        RFa(i) = RFa(i) + m
    Loop

    NU(i) = NU(i - 1) + n(i) ' water used for watering during a month
    If n(i) > 0 Then ' if at least one watering has been done
        Cells(frL + 9, frC1 + i) = Format(n(i) * m, "0#")
    Else
        Cells(frL + 9, frC1 + i) = "0"
        Cells(frL + 12, frC1 + i) = n(i)
    End If
    Cells(frL + 10, frC1 + i) = Format(Ri(i), "0###")

    If RFa(i) > 0 Then ' if water has been added by irrigation
        Cells(frL + 11, frC1 + i) = Format(RF(i) + RFa(i), "0###")
        RF(i) = RF(i) + RFa(i) ' update the final reserve
    Else
        Cells(frL + 11, frC1 + i) = Format(RF(i), "0###") ' write the final water reserve
        Cells(frL + 12, frC1 + i) = n(i) ' write the watering number
    End If
    Next i
    Cells(frL + 13, frC1 + 1) = Format(m * NU(12), "0###") ' write the irrigation rate
    MsgBox "WELL DONE!", vbInformation
Exit Sub
LAST:
MsgBox "Calculation aborted!", vbCritical
End Sub

```
