# Supplementary material
Source: MDPI journal article supplement (https://www.mdpi.com/2073-4441/14/15/2399)
Supplement: s1 [file s1 › Supplemetary Material S2.xlsm]

## Sheet: Sheet1
IRRIGTOOL
This MSExcel template is developed for estimating the irrigation rate.
The user has the option to compute the evapotranspiration by the Thornthwaite
equation or to manually introduce the measured evapotranspiration.
The users may refer to the following article for information on the working procedure.
Dumitriu C.S., Barbulescu, A., Maftei, C.E. IrrigTool - A new tool for determining the irrigation rate based on the Thornthwaite equation for the evapotranspiration computation. Water 2022, 14
When using this tool, please cite the above article.

## Sheet: Irrigation S1
Check the results!
	No	1	2	3	4	5	6	7	8	9	10	11	12
	Month	X	XI	XII	I	II	III	IV	V	VI	VII	VIII	IX		DATA SELECTION
	Pu	506.864	454.636	419.455	445.045	318.909	394.909	311.955	484.409	454.455	501.727	413.091	486.909		K1-code	17
	t	13.7136	8.73182	3.23636	1.44545	2.95909	6.59091	11.2091	16.8455	21.6636	24.0591	24.1182	19.4045		Kp-code	11
	K1	0.94	0.79	0.75	0.8	0.81	1.02	1.13	1.28	1.29	1.31	1.21	1.04		Af-code	11
	Kp	0.7	0.85	0.9	0.9	0.85	0.6	0.81	0.75	0.85	1.33	1.26	0.77		Soil-code for Winter	11
	Af	0	0	0	0	0	0	0	0	0	0	0	0		Soil-code for Summer	12
	ETRM	353	191	48	16	43	117	370	687	1117	2055	1805	699		ETRM-code	auto
	Rmax	4489	4489	4489	4489	4489	4489	2355	2355	2355	2355	2355	2355		Ri for month X	0
	Rmin	1335	1335	1335	1335	1335	1335	1543	1543	1543	1543	1543	1543
	m	0	0	0	0	0	0	0	0	812	1623	812	812
	Ri	3062	3216	3479	3851	4280	4489	2245	2187	1984	2134	2203	1624
	Rf	3216	3479	3851	4280	4489	4489	2187	1984	2134	2203	1624	2224
	Watering no.	0	0	0	0	0	0	0	0	1	2	1	1
	M (sum m)	4058

## Sheet: Irrigation S2
Check the results!
		1	2	3	4	5	6	7	8	9	10	11	12
	Month	X	XI	XII	I	II	III	IV	V	VI	VII	VIII	IX		DATA SELECTION
	Pu	500.773	469.091	439.318	449.182	306.045	365.682	395.727	417.545	619.591	584.455	325.136	506.818		K1-code	17
	t	11.9955	7.09091	1.77273	-0.0681818	1.82727	5.95909	11.6591	17.3773	21.7364	23.9409	23.5227	18.1182		Kp-code	13
	K1	0.94	0.79	0.75	0.8	0.81	1.02	1.13	1.28	1.29	1.31	1.21	1.04		Af-code	11
	Kp	0.7	0.85	0.9	0.9	0.85	0.6	0.94	0.61	0.98	1.29	1.28	0.81		Soil-code for Winter	11
	Af	0	0	0	0	0	0	0	0	0	0	0	0		Soil-code for Summer	12
	ETRM	304	152	23	0	25	110	472	596	1307	1991	1781	680		ETRM-code	auto
	Rmax	4489	4489	4489	4489	4489	4489	2355	2355	2355	2355	2355	2355		Ri for month X	0
	Rmin	1335	1335	1335	1335	1335	1335	1543	1543	1543	1543	1543	1543
	m	0	0	0	0	0	0	0	0	812	1623	812	812
	Ri	3062	3259	3576	3991	4441	4489	2245	2168	1989	2114	2331	1687
	Rf	3259	3576	3991	4441	4489	4489	2168	1989	2114	2331	1687	2325
	Watering no.	0	0	0	0	0	0	0	0	1	2	1	1
	M (sum m)	4058

## Sheet: Pu, t (S1)
From year...	To year...	Pu (mm)	t (°C)				22 years	Check the results!
1	22	42.7	11.5				Month	X	XI	XII	I	II	III	IV	V	VI	VII	VIII	IX
		53.7	7.9				PuAvg	50.6864	45.4636	41.9455	44.5045	31.8909	39.4909	31.1955	48.4409	45.4455	50.1727	41.3091	48.6909
		37.2	3				tAvg	13.7136	8.73182	3.23636	1.44545	2.95909	6.59091	11.2091	16.8455	21.6636	24.0591	24.1182	19.4045
		26.9	3.4
		22.3	3
		32.5	4.9
		6.4	13.3
		33.1	15.6
		39.8	21.6
		36.9	22.7
		18.5	23.8
		92.7	18.3
		46	14.5
		107.7	5.8
		25.9	-1.2
		13.7	2.2
		20.4	3.2
		36.5	7.1
		51.1	11.9
		31.3	15.6
		62.1	22.6
		9.7	25.6
		100.4	23
		71.6	19.6
		59.1	13.6
		19.7	7.4
		55.5	5.3
		44.4	-2.2
		31.1	4.1
		26.9	5.9
		18.1	11.9
		15.1	17.2
		71.4	20.6
		10.2	23.3
		1.2	23.3
		25.7	17
		8.4	13.2
		28.7	11.3
		11.3	5.7
		5.5	4.1
		58.5	4.2
		53.1	9.1
		48.6	10.4
		30.1	15.9
		30.9	19.2
		2.7	25.8
		29.6	24.6
		71.4	19.5
		2.8	14.9
		47.3	6.5
		19.9	-1.9
		15.1	0.3
		4.7	7.4
		82.1	8.1
		16.6	9.8
		19.3	17.2
		21.2	21.6
		20.4	25.8
		50.6	23.2
		57.1	18.9
		65.3	13.7
		34	10.2
		45.2	-0.8
		53	1
		14.9	-2.8
		16.9	2.8
		25.4	7.7
		5.2	17.9
		9.1	22.4
		32.9	23.1
		0.2	24.2
		80.1	17.6
		63.7	12.3
		25.5	8.7
		23.3	3.2
		51.3	-0.7
		20.2	2.4
		25.9	7.2
		2.3	11.4
		100.4	15.4
		59	20.7
		38.3	22.3
		259.2	22.2
		27.4	18.7
		13.5	15
		5.9	8.9
		71.4	5.2
		55.2	3.7
		51.3	0
		24.9	4.7
		33.6	9.9
		22.2	16.6
		36.9	20
		84.4	23.4
		7.1	23.6
		149.8	19.8
		64.4	13.2
		93.9	7.5
		26.2	4
		19	-1.7
		36	0.8
		66	5.8
		15	10.7
		81	16.3
		13	20.9
		77	23.3
		50	24.1
		47	19.4
		4.4	14.7
		27	8.5
		12	4.7
		28	6.5
		18	4.9
		34	7.7
		21	11
		20	16.8
		21	22.8
		4	25
		84	24.5
		56	18.2
		55	14.1
		108	7.1
		48	2
		40	1.1
		0.5	3.8
		26	9.1
		112	12.3
		44	16.1
		50	21.6
		34	23
		1.4	24.4
		21	18.1
		9.8	14.4
		40	9.1
		48	5.7
		37	2.4
		37	4.1
		15	6.4
		25	11.2
		50	16.8
		4.6	21.4
		106	24.7
		6.2	23
		45	19.5
		49	14.8
		5.3	9.8
		80	4.3
		50	-0.3
		67	2.4
		46	6
		14	11.8
		36	17.3
		82	21.1
		89	24.4
		0.4	26.7
		34	19.5
		82	11.8
		22	13.4
		60	3.2
		39	1
		21	0.6
		20	4.7
		40	9.2
		40	16.1
		13	21.3
		37	24
		0.8	23.5
		6.2	21.1
		41	12.1
		0.5	5.2
		55	5.1
		122	0.6
		19	-2.1
		17	6.1
		27	12.6
		134	18.2
		8.8	22.9
		2.9	26
		26	24.3
		3	20.5
		29	16.6
		19	10.1
		80	2.3
		37	2.1
		12	4.8
		12	5.7
		27	12.4
		36	18.9
		75	22.1
		42	23.5
		24	24.6
		81	18.5
		154	12.7
		21	10.8
		9.5	2.2
		66	3
		0.7	3.2
		48	8
		27	11.6
		77	17
		160	21
		5	23.7
		115	24.6
		21	19.9
		61	13.4
		51	7.4
		116	4.4
		41	2.2
		104	2.5
		95	6.2
		61	11
		29	17.2
		14	21.4
		38	24
		69	24.3
		17	21.2
		103	13.3
		88	10.5
		2.2	5.1
		59	0.2
		26	8
		36	7.9
		20	13.7
		92	16.3
		78	22.4
		0.4	24.7
		4.8	24.6
		74	20.5
		92	12.6
		49	8.2
		3.2	1.3
		37	-2.4
		17	2.9
		53	8
		44	9.2
		53	16
		81	22.1
		144	23.2
		28	24.4
		0.6	20.7
		52	13.9
		38	9.6
		47	6.3
		54	3.2
		93	3.3
		66	4.7
		5.2	12.9
		58	19.1
		62	22.1
		235	23.8
		0.4	25.4
		8.6	19.8
		17	15.4
		115	8.2
		46	2.1
		85	2.1
		27	4.4
		36	8.9
		46	10.7
		59	17.1
		7	24.8
		54	24
		32	24.3
		81	20.6

## Sheet: Pu, t (S2)
From year...	To year...	Pu (mm)	t (°C)				22 years	Check the results!
1	22	38.8	10.4				Month	X	XI	XII	I	II	III	IV	V	VI	VII	VIII	IX
		68	6.2				PuAvg	50.0773	46.9091	43.9318	44.9182	30.6045	36.5682	39.5727	41.7545	61.9591	58.4455	32.5136	50.6818
		40.7	1.4				tAvg	11.9955	7.09091	1.77273	-0.0681818	1.82727	5.95909	11.6591	17.3773	21.7364	23.9409	23.5227	18.1182
		20	2.2
		5.8	3.4
		20.2	4.4
		13.3	13.7
		26.3	16.5
		48.3	22.1
		66.9	23.3
		34	22.3
		115.4	16.6
		79.6	12.7
		92.2	3.5
		5.2	-2.7
		17.9	0.4
		13.2	2.7
		47.3	6.2
		37.2	12.4
		39.3	15.7
		114.8	22.5
		38.3	25
		168.6	22.7
		59.2	17.9
		41.1	11.7
		13.5	5.2
		50.5	3.6
		54.1	-2.5
		28.8	2.9
		8.8	5.7
		24.3	13.1
		3.5	18.2
		44.7	21
		6.2	23.7
		9.1	22.7
		95.5	16.4
		3.5	11
		66.7	10.3
		12.5	4.7
		3.9	2
		23.7	2.8
		37.3	8.2
		21.6	11.1
		42.8	16.9
		88.5	19.4
		14.9	25.5
		17.2	23.6
		54	17.6
		29.4	12.6
		55.1	5.2
		31.5	-2.7
		12.7	0.2
		21.5	6.5
		64.9	8
		30.5	10.5
		25.9	17.5
		25.4	21.9
		15.2	25.4
		83.8	22.2
		22.5	17.8
		87.4	12.1
		49.1	9
		21.1	-3.8
		51.6	-1
		37.7	-4.5
		9.8	-2.1
		29.6	8.9
		7	19.6
		10.4	22.4
		97.5	22.7
		15.8	23.5
		40	16
		40.2	10.8
		17.8	7.4
		40.1	1.4
		49.6	-2.1
		16.2	1.6
		16.5	6.9
		19.4	11.4
		90.4	15.7
		29.6	20.1
		137.8	22.2
		100.4	21.9
		36	17.3
		31.4	13.3
		42.4	6.9
		49.3	3.9
		58.4	2.4
		43.7	-0.9
		57.4	3.7
		70.1	10.5
		53	17.3
		56.2	20.1
		87.2	23.1
		37.4	22.4
		51	18.4
		10.3	11.2
		91.2	5.6
		36	3
		28	-3.7
		14	-0.1
		49	5.7
		50	11.6
		55	17.7
		74	22.3
		12	24.2
		49	24.3
		59	18.9
		4	13.6
		12	7.8
		19	4.1
		28	5.1
		20	3.3
		36	7.3
		21	11.3
		12	18.7
		36	23.3
		1.6	25.9
		48	24.5
		56	17.3
		83	12.5
		76	5.2
		99	1.2
		14	0.2
		5.4	3.1
		30	8.5
		50	12
		23	16.1
		62	21.3
		43	22.8
		2	23.8
		87	16.3
		17	12.4
		16	7.4
		47	3.6
		53	0.7
		20	3
		34	5.4
		6	11.1
		25	16.7
		7.2	21.5
		115	24.1
		6.2	22.1
		40	18.5
		42	13.4
		11	7.8
		110	1.4
		44	-2.4
		69	1.4
		47	5.4
		31	11.4
		60	17.8
		128	21.4
		59	24.6
		3.8	25.8
		33	18
		75	9.5
		22	11.8
		79	1.3
		71	-1.6
		26	-1.4
		17	4.6
		47	9.8
		51	16.5
		61	20.8
		32	23.1
		2.2	22.6
		31	19.9
		28	10.2
		5	3.2
		33	3.9
		102	-1.1
		20	-4.1
		8.8	5.9
		27	13.5
		73	19.2
		51	23.3
		20	26.2
		42	24.4
		16	19
		34	14.8
		15	7.8
		91	0.2
		80	0.5
		23	3.8
		10	5
		26	13.2
		34	19.2
		87	22.2
		61	23.2
		12	23.7
		100	16.7
		103	11.5
		15	9.8
		4.3	1.7
		71	1
		20	1.1
		43	8.8
		53	12
		115	16.9
		48	20.7
		40	23.7
		23	24.1
		25	18.7
		42	11.5
		89	6
		100	2.7
		21	1.7
		75	2.1
		105	6.1
		59	11.3
		4.4	17.8
		29	21.5
		20	24.5
		19	24.4
		30	20.2
		113	11.3
		113	9.3
		3.4	3.7
		88	-1.5
		2.3	6.9
		56	7.6
		44	13.6
		99	16.1
		69	22.4
		1.2	24
		10	23.9
		83	19.5
		93	10.6
		34	6.3
		8.9	0.6
		33	-3.4
		32	1.9
		35	8.3
		120	9.6
		28	16
		128	21.6
		139	22.9
		9.8	23.9
		0.4	19.9
		93	12.5
		43	8
		46	4.9
		38	0.7
		107	1.3
		63	3.2
		1.6	14.2
		35	18.8
		133	21.8
		105	23
		0	24.4
		46	18.4
		13	14.3
		85	6.3
		39	0.9
		49	0.7
		49	3.4
		8.5	8.3
		89	10.3
		16	17.4
		32	24.6
		173	23.6
		22	24.3
		35	19.3

## Sheet: ETRM
ETRM-Code	References	Month	X	XI	XII	I	II	III	IV	V	VI	VII	VIII	IX
11		ETRM	340	172	56	20	48	130	392	830	1186	1892	1657	782

## Sheet: K1
K1-Code	Latitude	Month	X	XI	XII	I	II	III	IV	V	VI	VII	VIII	IX
11	0	K1	1.04	1.01	1.04	1.04	0.94	1.04	1.01	1.04	1.01	1.04	1.04	1.01
12	10	K1	1.02	0.98	0.99	1	0.91	1.03	1.03	1.08	1.06	1.08	1.07	1.02
13	20	K1	1	0.93	0.94	0.95	0.9	1.03	1.05	1.13	1.11	1.14	1.11	1.02
14	30	K1	0.98	0.89	0.88	0.9	0.87	1.03	1.08	1.18	1.17	1.2	1.14	1.03
15	35	K1	0.97	0.86	0.85	0.87	0.85	1.03	1.09	1.21	1.21	1.23	1.16	1.03
16	40	K1	0.97	0.86	0.81	0.84	0.83	1.03	1.11	1.24	1.25	1.27	1.18	1.04
17	45	K1	0.94	0.79	0.75	0.8	0.81	1.02	1.13	1.28	1.29	1.31	1.21	1.04	*used in the example
18	46	K1	0.94	0.79	0.74	0.79	0.81	1.02	1.13	1.29	1.31	1.32	1.22	1.04
19	47	K1	0.94	0.78	0.73	0.77	0.8	1.02	1.13	1.3	1.32	1.33	1.22	1.04
20	48	K1	0.93	0.77	0.72	0.76	0.8	1.02	1.14	1.31	1.33	1.34	1.23	1.05
21	49	K1	0.93	0.76	0.71	0.75	0.79	1.02	1.14	1.32	1.34	1.35	1.24	1.05
22	50	K1	0.92	0.76	0.7	0.74	0.78	1.02	1.15	1.33	1.36	1.37	1.25	1.06

## Sheet: Kp
Kp-Code	Description	Month	X	XI	XII	I	II	III	IV	V	VI	VII	VIII	IX
11	corn (Constanta)	Kp	0.7	0.85	0.9	0.9	0.85	0.6	0.81	0.75	0.85	1.33	1.26	0.77
12	alphaalpha (Constanta)	Kp	1	1	1	1	1	1	1.6	1.11	1.01	1.07	1.15	0.97
13	corn (Tulcea)	Kp	0.7	0.85	0.9	0.9	0.85	0.6	0.94	0.61	0.98	1.29	1.28	0.81
14	alphaalpha (Tulcea)	Kp	1	1	1	1	1	1	1.53	1.32	1.33	1.27	1.3	1.19

## Sheet: Af
Af-Code	Description	Month	X	XI	XII	I	II	III	IV	V	VI	VII	VIII	IX
11	pesimistic	Af (m3/ha)	0	0	0	0	0	0	0	0	0	0	0	0

## Sheet: Soil
Soil-code	Location (zone)	Season	Culture (crop)	Soil texture	Soil characteristics
				data	H or h (m)	DA(t/m3)	C0(%)	Cc(%)
11	Dobrogea	Winter	Corn	medium	1.5	1.29	6.9	23.2
12	Dobrogea	Summer	Corn	medium	0.75	1.3	7.5	24.15
13	Dobrogea	Winter	Sunflower	medium	1.5	1.29	6.9	23.2
14	Dobrogea	Summer	Sunflower	medium	1	1.28	7.4	23.9

[truncated: 1 more sheets: S1 vs S2]
